# Supplementary material for: Guidance on how to improve vertical covariance localization based on a 1000-member ensemble
Source: Copernicus journal article supplement (doi:10.5194/egusphere-2022-434), 2022-06-09

## APPENDIX

Fig 1 Extended x-range

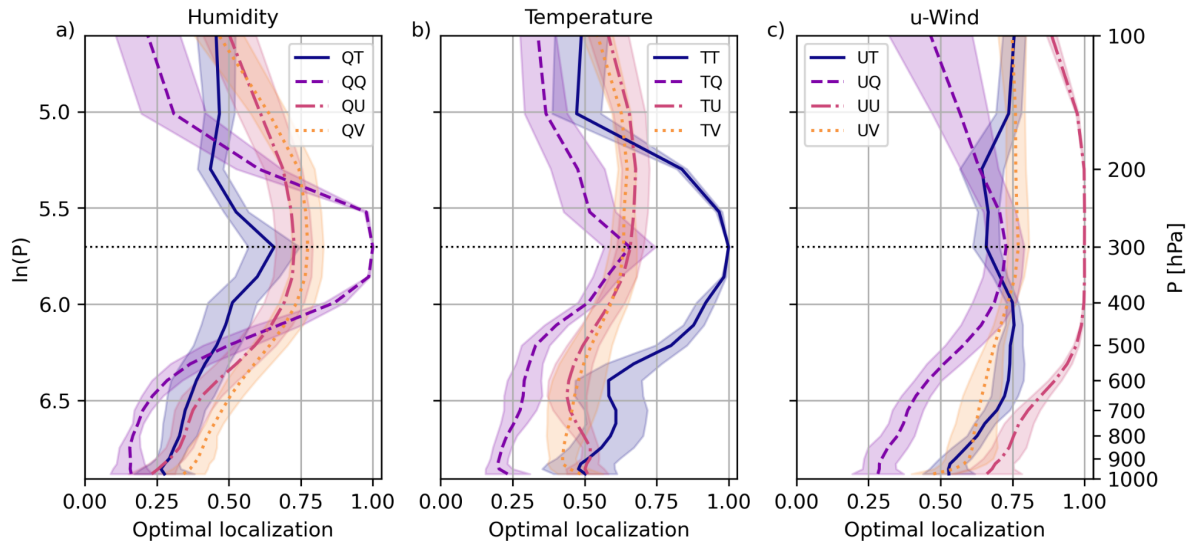

Fig 2: Only SEC + EOL shows EOL values larger than 1

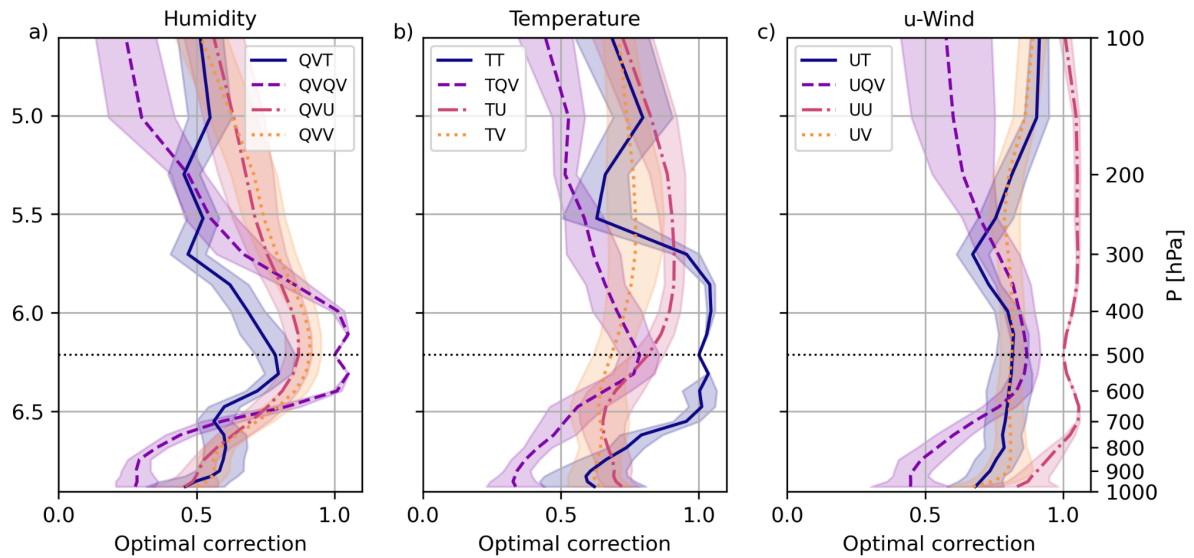

Fig 3 Sample correlations

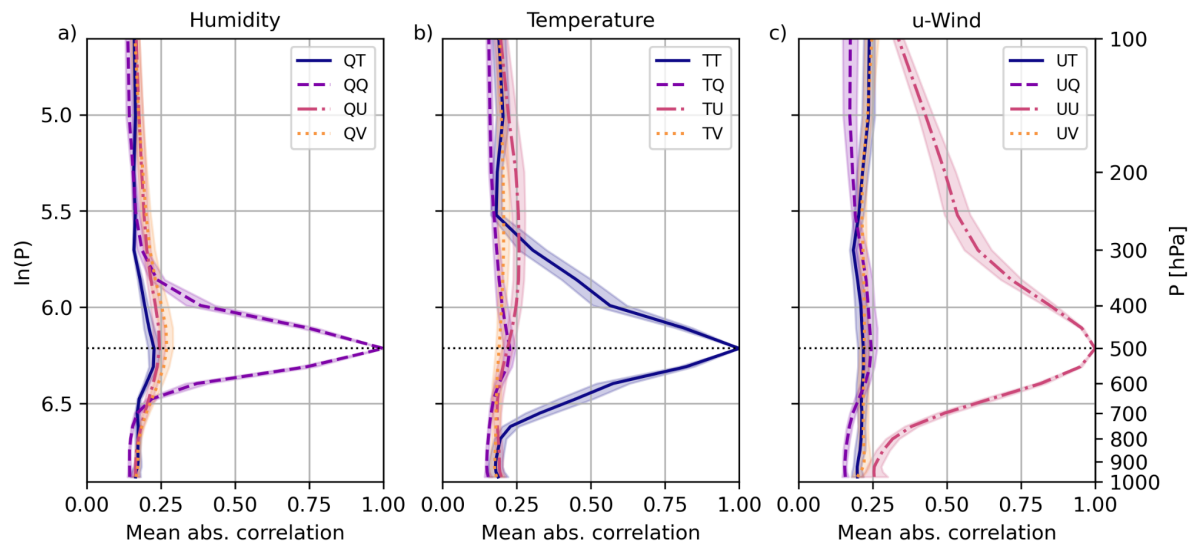

Fig 4 True correlations for comparison with Fig 3 (Note: This is Fig 2 from the manuscript)

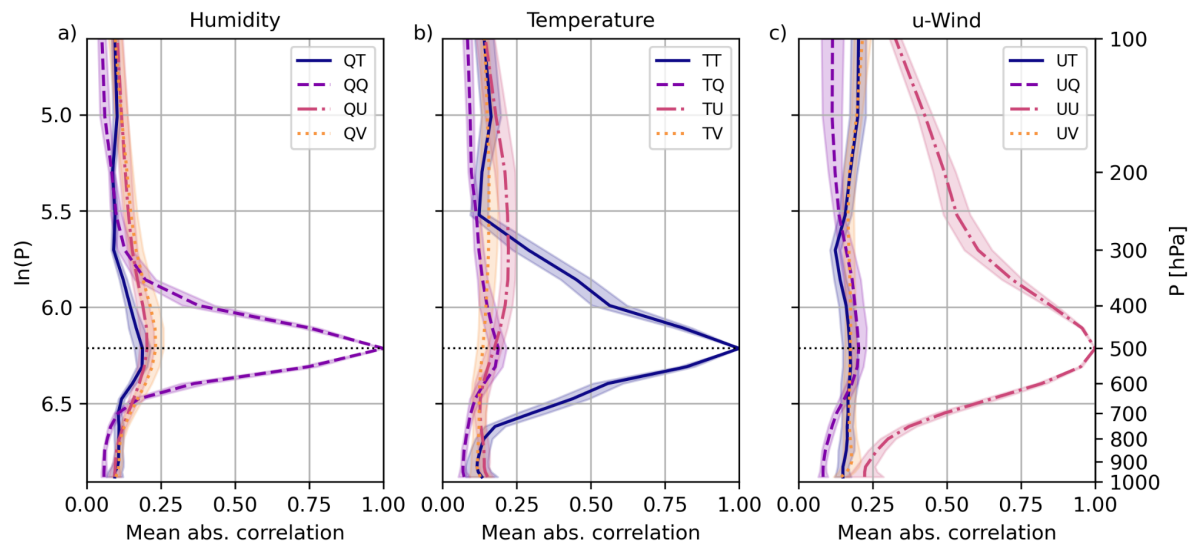

Supplement: Supplementary file [file egusphere-2022-434-AC1-supplement.pdf]
