# Supplementary material for: Guidance on how to improve vertical covariance localization based on a 1000-member ensemble
Source: Copernicus journal article supplement (doi:10.5194/egusphere-2022-434), 2022-06-09

## Appendix

Figure 1: Localization matrix based on domain-uniform EOL (SINGLE variable case)

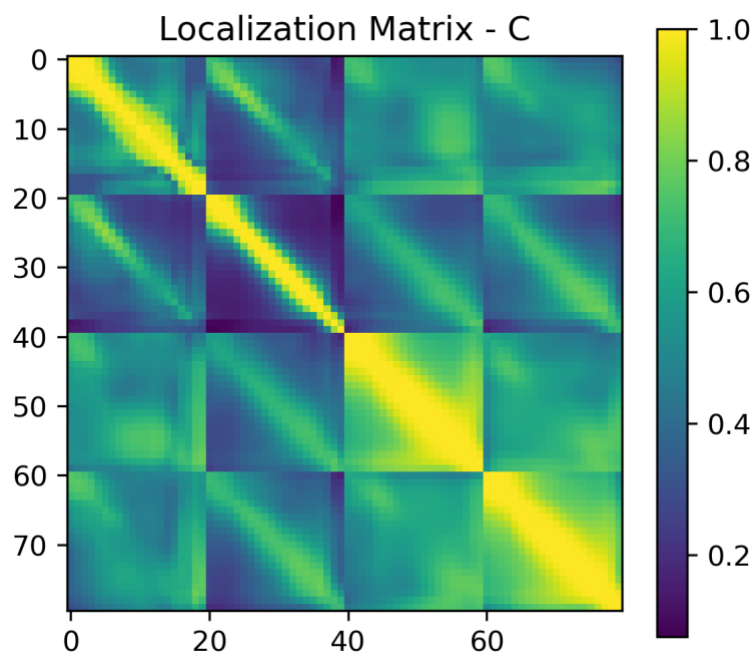

Figure 2: SPSD localization matrix constructed using non-negative eigenvalues

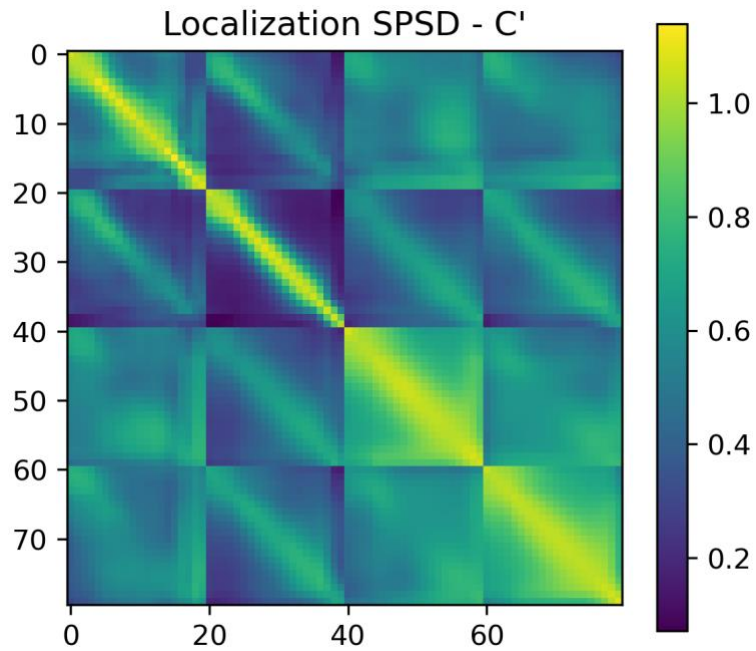

Figure 3: Difference between matrix C and C' showed in Figures 1 & 2

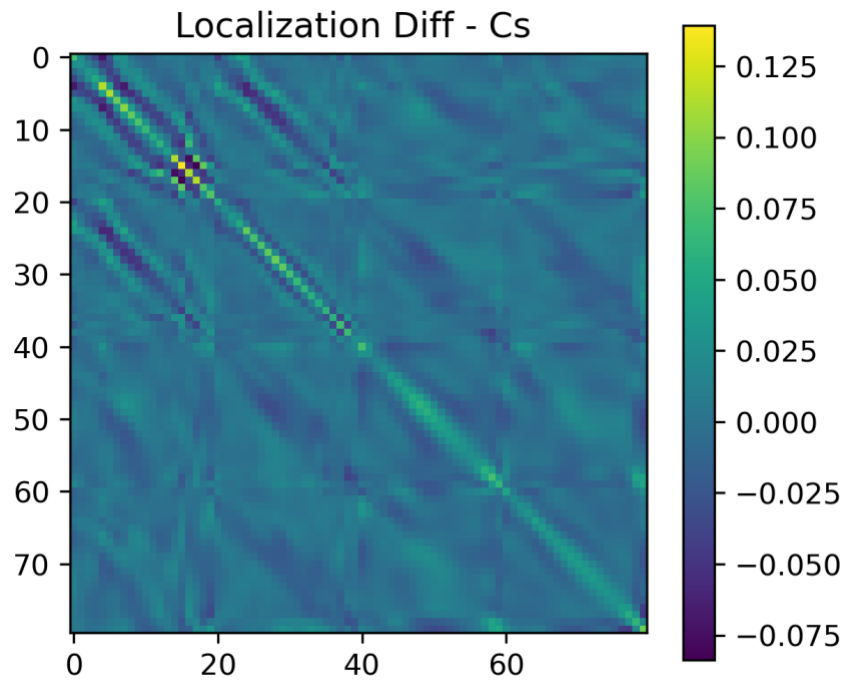

Supplement: Supplementary file [file egusphere-2022-434-AC3-supplement.pdf]
